# Supplementary material
Source: ML conference proceedings conference paper supplement (https://aclanthology.org/P18-1109)

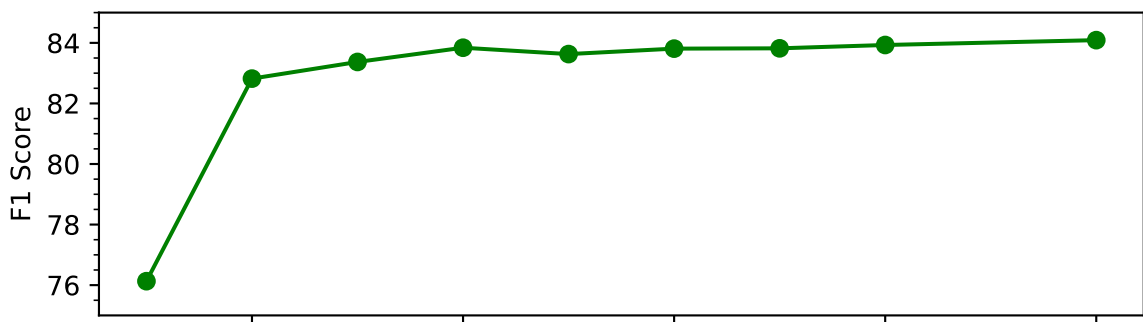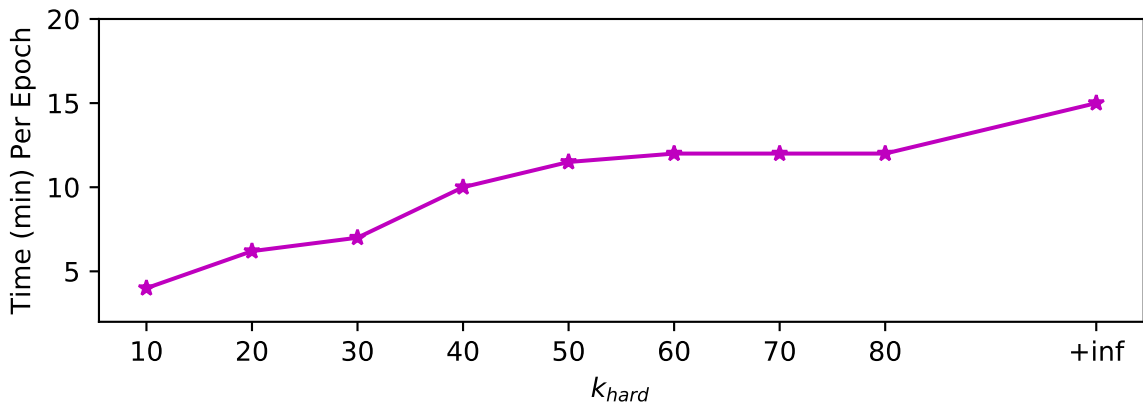

Supplement: Notes [file comp_prune.pdf › comp_prune.pdf]
